# Supplementary material
Source: ML conference proceedings conference paper supplement (https://openreview.net/forum?id=oPzICxVFqVM)
Supplement: supplementary_material [file attachment]

## A Proofs of Theorem 1 and Corollary 1

### A.1 Proofs

*Proof of Theorem 1.* Recall the differential inequality (28) below from Proposition 2:

$$-\frac{d}{dt}W_2(p_t, q_t) \leq (L_f + L_s g^2)W_2(p_t, q_t) + g^2 b^{\frac{1}{2}}.$$

It can be solved by introducing the integrating factor,

$$I(t) := \exp\left(\int_0^t L_f(r) + L_s(r)g(r)^2 dr\right) \text{ where } b(t) := \mathbb{E}_{p_t} [\|\nabla \log p_t(x) - s_\theta(x, t)\|^2]. \quad (29)$$

As  $\frac{d}{dt}I(t) = (L_f(t) + L_s(t)g(t)^2)I(t)$ , the above inequality (28) can be written as

$$-\frac{d}{dt}\{I(t)W_2(p_t, q_t)\} \leq g(t)^2 I(t)b(t)^{\frac{1}{2}}.$$

Integrating both sides from 0 to  $T$ , we obtain that

$$I(0)W_2(p_0, q_0) - I(T)W_2(p_T, q_T) \leq \int_0^T g(t)^2 I(t)b(t)^{\frac{1}{2}} dt.$$

As  $I(0) = 1$ , we conclude that

$$W_2(p_0, q_0) \leq \int_0^T g(t)^2 I(t)b(t)^{\frac{1}{2}} dt + I(T)W_2(p_T, q_T). \quad (30)$$

□

*Proof of Corollary 1.* Let

$$J_I(\theta) = \int_0^T g(t)^2 I(t)b(t)^{\frac{1}{2}} dt. \quad (31)$$

Here,  $I(t)$  and  $b(t) = \mathbb{E}_{p_t} [\|\nabla \log p_t(x) - s_\theta(x, t)\|^2]$  are given in (29). The Cauchy-Schwarz inequality yields

$$J_I(\theta) \leq \left(\int_0^T 2g(t)^4 I(t)^2 \lambda(t)^{-1} dt\right)^{\frac{1}{2}} \left(\frac{1}{2} \int_0^T \lambda(t)b(t) dt\right)^{\frac{1}{2}}. \quad (32)$$

Since  $\lambda = g^2$  and  $J_{SM}$  given in (5) satisfies

$$J_{SM}(\theta; \lambda) = \frac{1}{2} \int_0^T \lambda(t) \mathbb{E}_{p_t} [\|\nabla \log p_t(x) - s_\theta(x, t)\|_2^2] dt = \frac{1}{2} \int_0^T \lambda(t)b(t) dt, \quad (33)$$

we conclude (34):

$$W_2(p_0, q_0) \leq \sqrt{2 \left(\int_0^T g(t)^2 I(t)^2 dt\right) J_{SM} + I(T)W_2(p_T, q_T)}.$$

□

**Remark 7.** It is expected that the parallel results hold for weak solutions to (2) and (4) by using suitable approximations. This approach has been studied for the Wasserstein contraction property in [8, Section 6.2].

From (32) and (33) in the proof of Corollary 1, we obtain the following result for other choices of  $\lambda$ .

**Corollary 4.** Let  $p_0$  and  $q_0$  be given in Theorem 1. Suppose that  $g^4 I^2 \lambda^{-1}$  is integrable in  $[0, T]$ . Then the following inequality holds:

$$W_2(p_0, q_0) \leq \sqrt{2 \left(\int_0^T g(t)^4 I(t)^2 \lambda(t)^{-1} dt\right) J_{SM} + I(T)W_2(p_T, q_T)}. \quad (34)$$

## A.2 Technical lemmas

**Lemma 1.** *Let  $\pi_t$  be an optimal transport plan between  $p_t$  and  $q_t$ . Then, we have*

$$\mathbb{E}_{\pi_t} [(x - y) \cdot (v[q_t](y) - v[p_t](x))] \leq W_2(p_t, q_t) \left\{ (L_f + L_s g^2) W_2(p_t, q_t) + g^2 b^{\frac{1}{2}} \right\} \quad (35)$$

where  $b(t) := \mathbb{E}_{p_t} [\|\nabla \log p_t(x) - s_\theta(x, t)\|^2]$ .

*Proof.* The left-hand side of (35) is given by

$$\begin{aligned} \mathbb{E}_{\pi_t} [(x - y) \cdot (v[q_t](y) - v[p_t](x))] &= \mathbb{E}_{\pi_t} [(x - y) \cdot (f(y, t) - f(x, t))] \\ &+ g^2 \mathbb{E}_{\pi_t} [(x - y) \cdot (\nabla \log p_t(x) - s_\theta(y, t))] \\ &+ \frac{g^2}{2} \mathbb{E}_{\pi_t} [(x - y) \cdot (\nabla \log q_t(y) - \nabla \log p_t(x))]. \end{aligned}$$

In Lemma 2 below, we prove that the last term is less than or equal to zero.

In what follows, we estimate the first two terms. First, using the Lipschitzness of  $f$  in space, we get

$$\mathbb{E}_{\pi_t} [(x - y) \cdot (f(y, t) - f(x, t))] \leq L_f \mathbb{E}_{\pi_t} [\|x - y\|^2] = L_f W_2^2(p_t, q_t).$$

The last equality follows from the fact that  $\pi_t$  is an optimal plan between  $p_t$  and  $q_t$ .

Next, the second term  $g^2 \mathbb{E}_{\pi_t} [(x - y) \cdot (\nabla \log p_t(x) - s_\theta(y, t))]$  is the sum of the following two terms:

$$I_1 := g^2 \mathbb{E}_{\pi_t} [(x - y) \cdot (s_\theta(x, t) - s_\theta(y, t))]$$

and

$$I_2 := g^2 \mathbb{E}_{\pi_t} [(x - y) \cdot (\nabla \log p_t(x) - s_\theta(x, t))].$$

As shown above, the former one  $I_1$  is bounded from above by  $g^2 L_s W_2^2(p_t, q_t)$ .

It suffices to find an upper bound on the latter one  $I_2$ . By the Cauchy-Schwarz inequality, we have

$$I_2 \leq g^2 \mathbb{E}_{\pi_t} [\|x - y\|^2]^{\frac{1}{2}} \mathbb{E}_{\pi_t} [|\nabla \log p_t(x) - s_\theta(x, t)|^2]^{\frac{1}{2}}.$$

As the marginals of  $\pi_t$  are  $p_t$  and  $q_t$ , it holds that

$$\mathbb{E}_{\pi_t} [\|\nabla \log p_t(x) - s_\theta(x, t)\|^2] = \mathbb{E}_{p_t} [\|\nabla \log p_t(x) - s_\theta(x, t)\|^2].$$

As a consequence, we conclude that

$$I_1 + I_2 \leq g(t)^2 W_2(p_t, q_t) \left\{ L_s W_2(p_t, q_t) + b(t)^{\frac{1}{2}} \right\}$$

where  $b(t) = \mathbb{E}_{p_t} [\|\nabla \log p_t(x) - s_\theta(x, t)\|^2]$ .  $\square$

Before proving the lemma below, let us recall some basic definitions from the theory of optimal transport. The Wasserstein distance defined in (7) has an equivalent formulation:

$$W_2(\mu, \nu) = \inf \left\{ \int_{\mathbb{R}^d} \|x - T(x)\|^2 d\mu : T_{\#}\mu = \nu \right\}^{\frac{1}{2}}. \quad (36)$$

The optimizer of the above problem is called the optimal map from  $\mu$  to  $\nu$ . It is well known that there exists a convex function  $\phi$  such that  $T = \nabla \phi$ .

**Lemma 2.**  $\mathbb{E}_{\pi_t} [(x - y) \cdot (\nabla \log q_t(y) - \nabla \log p_t(x))]$  is nonpositive.

*Proof.* Let  $T_t$  be an optimal transport map from  $p_t$  to  $q_t$  and a convex function  $\phi_t$  satisfy  $\nabla \phi_t = T_t$  for all  $t \in [0, T]$ . As in the proof of [7, Theorem 1], we have

$$\mathbb{E}_{\pi_t} [(x - y) \cdot (\nabla \log q_t(y) - \nabla \log p_t(x))] = -\mathbb{E}_{p_t} [\Delta \phi_t + \Delta \phi_t^*(\nabla \phi_t) - 2d] \quad (37)$$

where  $\phi_t^*$  is a convex conjugate of  $\phi_t$ . The convexity of  $\phi_t$  yields that  $\Delta \phi_t + \Delta \phi_t^*(\nabla \phi_t) - 2d$  and we conclude.  $\square$

## B Further analysis of the upper bound

*Proof of Corollary 2.* Recall from Corollary 1 that

$$W_2(p_0, q_0) \leq \sqrt{2 \left( \int_0^T g(t)^2 I(t)^2 dt \right) J_{SM} + I(T) W_2(p_T, q_T)}. \quad (38)$$

Based on the contraction property [8], we quantify the Wasserstein distance between  $p_T$  and  $\phi$ .

$$W_2(p_T, \phi) \leq \exp \left( - \int_0^T \frac{\beta(t)}{2} dt \right) W_2(p_0, \phi). \quad (39)$$

Using the above, the definition of  $I(t)$ , and  $q_T = \phi$ , we conclude (19).  $\square$

It worth noting that as a consequence of (39),  $W_2(p_T, \phi)$  is small for an appropriate choice of  $T$  and  $\beta(t)$ .

### B.1 Exponential convergence of $h_t$

For simplicity of notations, we define the norm in  $L^2(\phi)$  as follows,

$$\|f\|_{L^2(\phi)} := \left( \int_{\mathbb{R}^d} f^2 d\phi \right)^{\frac{1}{2}}, \quad (40)$$

where  $\phi$  is given in (18). In addition, assume that

$$\beta(t) > c > 0 \text{ for all } t \geq 0. \quad (41)$$

**Lemma 3.** *Under the same setting as in Corollary 2, we have*

$$\|h_t - 1\|_{L^2(\phi)} \leq \exp \left( - \frac{\sigma^2 \lambda}{2} \int_0^T \beta(t) dt \right) \|h_0 - 1\|_{L^2(\phi)}. \quad (42)$$

where  $h_t = p_t/\phi$  for some constant  $\lambda > 0$ . In particular,  $h_t$  exponentially converges to 1 in  $L^2(\phi)$  for  $\beta$  satisfying (41).

For a constant function  $\beta$ , Lemma 3 is proven in [23]. For the sake of completeness, we provide the proof, which is a small modification of [23, Section 2].

*Proof of Lemma 3.* In our case, the equation (2) of  $p_t$  is given by

$$\partial_t p - \frac{\beta}{2} (\nabla \cdot (px) + \sigma^2 \Delta p) = 0, \quad p(\cdot, 0) = p_0. \quad (43)$$

By direct computations, we obtain the equation of  $h(x, t) = h_t(x)$  as follows:

$$\partial_t h - \frac{\beta}{2} (-\nabla h \cdot x + \sigma^2 \Delta h) = 0, \quad h(\cdot, 0) = h_0. \quad (44)$$

We estimate  $\|h - 1\|_{L^2(\phi)}^2$  by differentiating it with respect to time. Using the integration by parts and Poincaré inequality, we obtain that

$$\frac{d}{dt} \|h - 1\|_{L^2(\phi)}^2 = -\sigma^2 \beta(t) \|\nabla h\|_{L^2(\phi)}^2 \leq -\sigma^2 \lambda \beta(t) \|h - 1\|_{L^2(\phi)}^2 \quad (45)$$

This yields (42). Lastly, for  $\beta$  satisfying (41),  $\|h_t - 1\|_{L^2(\phi)}^2 \leq \exp(-\sigma^2 \lambda ct) \|h_0 - 1\|_{L^2(\phi)}^2$ . Thus, we conclude the exponential convergence of  $h$  to 1.  $\square$

**Remark 8.** *The convergence of  $h_t$  to 1 can be shown under more general assumption:  $\beta > 0$  satisfying*

$$\lim_{T \rightarrow \infty} \int_0^T \beta(t) dt = \infty.$$

Further analysis is plausible based on the techniques in the study of partial differential equations.

**Remark 9.** As  $p_t$  is given as the convolution between  $p_0$  and the Gaussian distribution, it is smooth for  $t > 0$ . Therefore,  $h_t$  is also smooth, and the higher-order derivatives of  $h_t$  are all bounded. As a consequence, the above result combined with Gagliardo–Nirenberg interpolation inequality yield that the gradient of  $h$ ,  $Dh$ , and the Hessian of  $h$ ,  $D^2h$ , also converge to zero in  $L^2(\phi)$ .

**Remark 10.** Proving the uniform convergence of  $h$ ,  $Dh$ , or  $D^2h$  requires an additional technical assumption that the support of  $h$  is bounded. Under the assumption, another interpolation inequality, Agmon’s inequality, yields the desired uniform convergence result.

## B.2 Estimation of $L_s$

In this subsection, we investigate the estimation of  $L_s$ . If  $J_{SM}$  is sufficiently small, then  $s_\theta$  is close to  $\nabla \log p_t$ . We first investigate the one-sided Lipschitz constant of  $\nabla \log p_t$ .

**Lemma 4.** Under the same setting as in Corollary 2,  $\nabla \log p_t$  satisfies the one-sided Lipschitz condition with a constant  $(-\sigma^{-2} + \|D^2(\log h)\|_\infty)$  i.e.,

$$(\nabla \log p_t(x) - \nabla \log p_t(y)) \cdot (x - y) \leq (-\sigma^{-2} + \|D^2(\log h)\|_\infty) \|x - y\|^2. \quad (46)$$

where  $\|\cdot\|_\infty$  denotes the supremum of the matrix norm,

$$\|D^2(\log h)\|_\infty := \sup_{x \in \mathbb{R}^d} \|D^2(\log h(x))\| = \sup_{x, y \in \mathbb{R}^d, \|y\| \leq 1} \|D^2(\log h(x))y\|. \quad (47)$$

*Proof.* From the definition of  $h_t$ , we have

$$\log p_t(x) = \log h_t(x) + \log \phi(x) = \log h_t(x) - \frac{x^2}{2\sigma^2} - c \quad (48)$$

for some constant  $c$ . As a consequence,

$$(\nabla \log p_t(x) - \nabla \log p_t(y)) \cdot (x - y) = (\nabla \log h_t(x) - \nabla \log h_t(y)) \cdot (x - y) - \sigma^{-2} \|x - y\|^2. \quad (49)$$

To prove (46), it suffices to estimate  $(\nabla \log h_t(x) - \nabla \log h_t(y)) \cdot (x - y)$ . From the fundamental theorem of calculus, we have

$$(\nabla \log h_t(x) - \nabla \log h_t(y)) = \int_0^1 D^2(\log h_t)(sx + (1-s)y) ds \cdot (x - y). \quad (50)$$

Using  $|z^\top D^2(\log h_t(w))z| \leq \|D^2(\log h_t)\|_\infty \|z\|^2$  for all  $w, z \in \mathbb{R}^d$ , we have

$$(\nabla \log h_t(x) - \nabla \log h_t(y)) \cdot (x - y) \leq \|D^2(\log h_t)\|_\infty \|x - y\|^2 \quad (51)$$

and conclude (46).  $\square$

**Remark 11.** Based on the similar relation as in (50), the difference between  $L_s$  and  $-\sigma^{-2} + \|D^2(\log h)\|_\infty$  can be estimated. More precisely, we have  $L_s(t) = (-\sigma^{-2} + \|D^2(\log h)\|_\infty) + \epsilon(t)$ . Here,  $\epsilon(t)$  depends on the difference between  $s_\theta$  and  $\nabla \log p_t$ . Therefore, it is expected that the upper bound of  $\int_0^T \epsilon(t) dt$  is given by  $J_{SM}$  under suitable regularity assumptions.

## C Proofs of Theorem 2 and Corollary 3

For a given  $t$ , let

$$J_{SM}(\theta, t) := \frac{1}{2} \mathbb{E}_{p_t(x)} [\|s_\theta(x, t) - \nabla_x \log p_t(x)\|^2], \quad (52)$$

and

$$J_{DSM}(\theta, t) := \frac{1}{2} \mathbb{E}_{p_0(x(0))p_{0t}(x|x(0))} [\|s_\theta(x, t) - \nabla_x \log p_{0t}(x|x(0))\|^2]. \quad (53)$$

**Lemma 5.** (Appendix in [36])

$$\mathbb{E}_{p_t(x)} [\nabla_x \log p_t(x)] = \mathbb{E}_{p_0(x(0))p_{0t}(x|x(0))} [\nabla_x \log p_{0t}(x|x(0))]. \quad (54)$$

*Proof of Theorem 2.* From Lemma 5 in [36], we have

$$J_{SM}(\theta, t) = J_{DSM}(\theta, t) + \frac{1}{2}(\mathbb{E}_{p_t(x)} [\|\nabla_x \log p_t(x)\|^2] - \mathbb{E}_{p_0(x(0))p_{0t}(x|x(0))} [\|\nabla_x \log p_{0t}(x|x(0))\|^2]) \quad (55)$$

Note that

$$\begin{aligned} & \mathbb{E}_{p_t(x)} [\|\nabla_x \log p_t(x)\|^2] - \mathbb{E}_{p_0(x(0))p_{0t}(x|x(0))} [\|\nabla_x \log p_{0t}(x|x(0))\|^2] \\ &= \mathbb{E}_{p_t(x)} [(\nabla_x \log p_t(x))^\top (\nabla_x \log p_t(x))] \\ & \quad - \mathbb{E}_{p_0(x(0))} [\mathbb{E}_{p_{0t}(x|x(0))} [(\nabla_x \log p_{0t}(x|x(0)))^\top (\nabla_x \log p_{0t}(x|x(0)) | x(0))] \\ &= \text{Var}[(\nabla_x \log p_t(x))^\top] - \mathbb{E}[\text{Var}[(\nabla_x \log p_{0t}(x|x(0)))^\top] | x(0)] \\ & \quad + (\mathbb{E}_{p_t(x)} [\nabla_x \log p_t(x)])^\top (\mathbb{E}_{p_t(x)} [\nabla_x \log p_t(x)]) \\ & \quad - \mathbb{E}_{p_0(x(0))} [(\mathbb{E}_{p_{0t}(x|x(0))} [\nabla_x \log p_{0t}(x|x(0)) | x(0)])^\top (\mathbb{E}_{p_{0t}(x|x(0))} [\nabla_x \log p_{0t}(x|x(0)) | x(0)])] \\ &\leq (\mathbb{E}_{p_t(x)} [\nabla_x \log p_t(x)])^\top (\mathbb{E}_{p_t(x)} [\nabla_x \log p_t(x)]) \\ & \quad - \mathbb{E}_{p_0(x(0))} [(\mathbb{E}_{p_{0t}(x|x(0))} [\nabla_x \log p_{0t}(x|x(0)) | x(0)])^\top (\mathbb{E}_{p_{0t}(x|x(0))} [\nabla_x \log p_{0t}(x|x(0)) | x(0)])] \end{aligned} \quad (56)$$

where the inequality comes from the law of total variance and our condition:

$$\begin{aligned} & \text{Var}[(\nabla_x \log p_t(x))^\top] - \mathbb{E}[\text{Var}[(\nabla_x \log p_{0t}(x|x(0)))^\top] | x(0)] \\ &= \text{Var}[\mathbb{E}[(\nabla_x \log p_{0t}(x|x(0)))^\top] | x(0)] \\ &= 0. \end{aligned} \quad (57)$$

Then, we have

$$\begin{aligned} & (\mathbb{E}_{p_t(x)} [\nabla_x \log p_t(x)])^\top (\mathbb{E}_{p_t(x)} [\nabla_x \log p_t(x)]) \\ & \quad - \mathbb{E}_{p_0(x(0))} [(\mathbb{E}_{p_{0t}(x|x(0))} [\nabla_x \log p_{0t}(x|x(0)) | x(0)])^\top (\mathbb{E}_{p_{0t}(x|x(0))} [\nabla_x \log p_{0t}(x|x(0)) | x(0)])] \\ &\leq (\mathbb{E}_{p_t(x)} [\nabla_x \log p_t(x)])^\top (\mathbb{E}_{p_t(x)} [\nabla_x \log p_t(x)]) \\ & \quad - (\mathbb{E}_{p_0(x(0))} \mathbb{E}_{p_{0t}(x|x(0))} [\nabla_x \log p_{0t}(x|x(0)) | x(0)])^\top (\mathbb{E}_{p_0(x(0))} \mathbb{E}_{p_{0t}(x|x(0))} [\nabla_x \log p_{0t}(x|x(0)) | x(0)]) \\ &= (\mathbb{E}_{p_t(x)} [\nabla_x \log p_t(x)] - \mathbb{E}_{p_0(x(0))} \mathbb{E}_{p_{0t}(x|x(0))} [\nabla_x \log p_{0t}(x|x(0)) | x(0)])^\top \\ & \quad (\mathbb{E}_{p_t(x)} [\nabla_x \log p_t(x)] + \mathbb{E}_{p_0(x(0))} \mathbb{E}_{p_{0t}(x|x(0))} [\nabla_x \log p_{0t}(x|x(0)) | x(0)]) \\ &= 0, \end{aligned} \quad (58)$$

where first inequality comes from Jensen's inequality, and the last equality comes from eq. (54).

Recall that  $J_{SM}(\theta, \lambda) = \int_0^T \lambda(t) J_{SM}(\theta, t) dt$  and  $J_{DSM}(\theta, \lambda) = \int_0^T \lambda(t) J_{DSM}(\theta, t) dt$ ,  $\lambda(t) > 0$ , we have that  $J_{DSM} \geq J_{SM}$ . Plugging it in eq. (34), we can get eq. (22).  $\square$

*Proof of Corollary 3.* We have  $p_{0t}(x|x(0)) = \mathcal{N}(\sqrt{\bar{\alpha}_t}x(0), (1 - \bar{\alpha}_t)I)$  where  $\bar{\alpha}_t = \prod_{r=1}^t (1 - \beta_r)$ , which can be inferred from  $p(x(t)|x(t-1)) = \mathcal{N}(\sqrt{1 - \beta_t}x(t-1), \beta_t I)$ .

Thus we can show that  $\mathbb{E}[\nabla_x \log p_{0t}(x|x(0))^\top | x(0)]$  is constant with respect to  $x(0)$ : recall  $p_{0t}(x|x(0)) = \mathcal{N}(\sqrt{\bar{\alpha}_t}x(0), (1 - \bar{\alpha}_t)I)$ , we have  $\nabla_x \log p_{0t}(x|x(0)) = -((1 - \bar{\alpha}_t)I)^{-1}(x(t) - \sqrt{\bar{\alpha}_t}x(0))$ , which is a linear function of  $x(t) - \sqrt{\bar{\alpha}_t}x(0)$ . Using the Gaussian density function, we have:

$$\int p_{0t}(x|x(0)) \nabla_x \log p_{0t}(x|x(0)) dx = 0, \quad (59)$$

As a result,  $\text{Var}[\mathbb{E}[(\nabla_x \log p_{0t}(x|x(0)))^\top] | x(0)] = 0$ , which satisfies the condition of eq. (21) in Theorem 2.

Note that here the assumption of  $f$  and  $g$  is only a sufficient condition for  $\text{Var}[\mathbb{E}[(\nabla_x \log p_{0t}(x|x(0)))^\top] | x(0)] = 0$ . In fact, any conditional distribution  $p_{0t}$  that satisfies  $\text{Var}[\mathbb{E}[(\nabla_x \log p_{0t}(x|x(0)))^\top] | x(0)] = 0$  can lead to the same conclusion.  $\square$

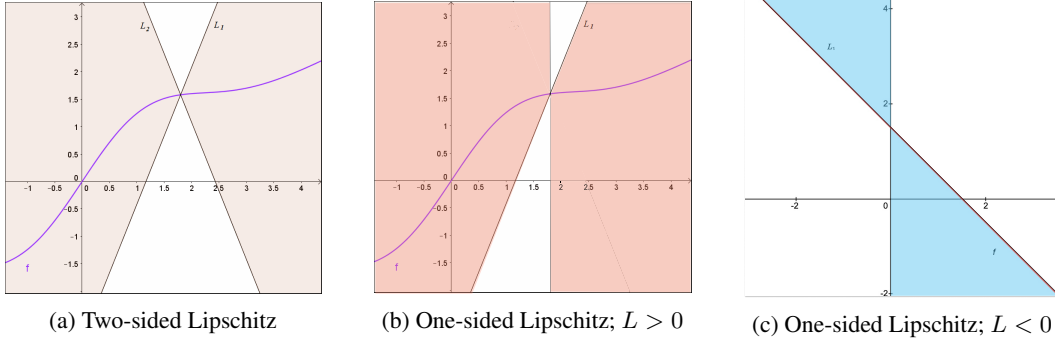

Figure 5: Two-sided and one-sided Lipschitzness.

## D One-sided Lipschitzness

For an arbitrary Lipschitz function  $F : \mathbb{R}^d \rightarrow \mathbb{R}^d$ , the Cauchy-Schwarz inequality yields that

$$(F(x) - F(y)) \cdot (x - y) \leq \|F(x) - F(y)\| \|x - y\| \leq L \|x - y\|^2 \quad (60)$$

where  $L$  is the Lipschitz constant of  $F$ . Therefore, all Lipschitz function satisfies the one-sided Lipschitz condition:

$$(F(x) - F(y)) \cdot (x - y) \leq L \|x - y\|^2. \quad (61)$$

As pointed out earlier in Section 3.2, the one-sided Lipschitz constant is not necessarily to be positive. For instance, if  $F(x) = -ax + b$  for  $a > 0$  and  $b \in \mathbb{R}^d$ , then  $-a < 0$  can be the one-sided Lipschitz constant of  $F$  while its Lipschitz constant is  $a > 0$ . Figure 5 visualizes this.

Note that two-sided Lipschitzness is a subset of one-sided Lipschitzness. See Figure 6 as an example.

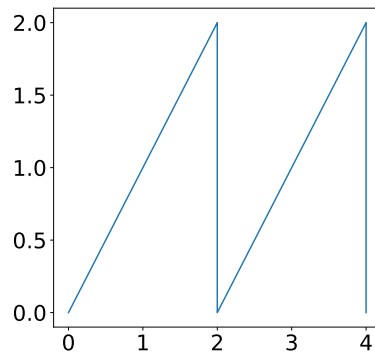

Figure 6: A function could be one-sided Lipschitz but not two-sided.

## E Full plot of $L_s(t)$ when $T = 100$

See Fig. 7b.

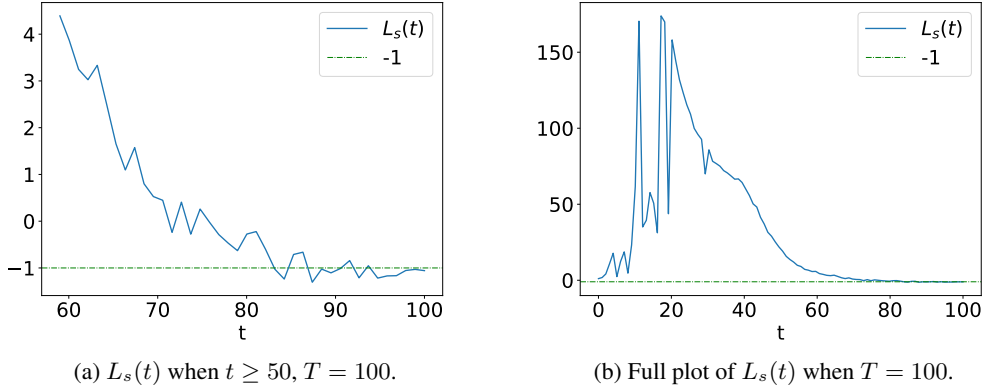

Figure 7: Plots of  $L_s(t), T = 100$ .

## F Numerical results on $J_{DSM}$ upper-bounding $J_{SM}$ in DDPM

To verify  $J_{SM} \leq J_{DSM}$  in (22) for DDPM, we adopt the same datasets as in Fig 1, and the same training and evaluation settings in Section 4.1.

Moreover, to estimate  $J_{SM}$  numerically, we estimate  $p_t(x)$  by performing Gaussian kernel density estimation with bandwidth = 0.05 on sampled data.  $\nabla_x p_t(x)$  is estimated by central difference approximation with interval = 0.01. The resulting plots of  $J_{DSM}$  and  $J_{SM}$  are shown in Fig 8, which shows that  $J_{DSM}$  is an upper bound of  $J_{SM}$  in DDPM during training, where  $p_0$  is the dataset, and  $q_0$  is the generated data distribution at the convergence of training.

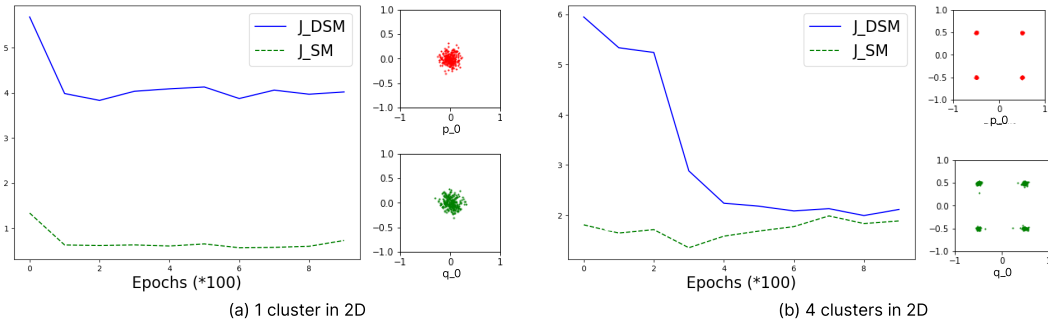

Figure 8:  $J_{SM}$  and  $J_{DSM}$  during training. The datasets are the same as 2D datasets in Fig 1. The training curves are obtained via training DDPM with modification of  $J_{DSM}$  loss.

## G Log-log plots with weight decay

See Fig. 9.

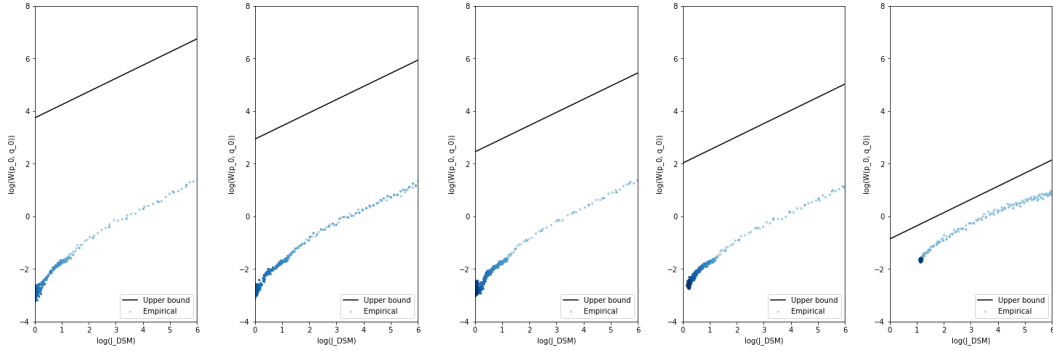

(a) Coefficient=0.01    (b) Coefficient=0.1    (c) Coefficient=0.5    (d) Coefficient=1    (e) Coefficient=5

Figure 9: Log-log plots for different weight decay coefficients. As the weight decay coefficient increases, the theoretical upper bound is approaching the empirical one.
